# Supplementary material
Source: publisher figshare collection journal article supplement (https://acs.figshare.com/ndownloader/files/12628796)
Supplement: Supplementary file 1 [file 12628796]

# Supporting Information

## **Luminescent nanofluids of organometal halide perovskite nanocrystals in silicone oils with ultrastability**

*Hechun Lin<sup>\*a</sup>, Pei Tian<sup>a</sup>, Chunhua Luo<sup>a</sup>, Hai Wang<sup>a</sup>, Jungang Zhang<sup>b</sup>, Jianping  
Yang<sup>b</sup>, Hui Peng<sup>a,c</sup>*

<sup>a</sup> Key Laboratory of Polar Materials and Devices, Ministry of Education, Department  
of Electrical Engineering, East China Normal University, Shanghai, P. R. China

<sup>b</sup> Shanghai Transcom Scientific Co., Ltd. 528 Ruiqing Rd. 20A, Z. J. East Area  
Hi-Tech Medical Park, Shanghai

<sup>c</sup> Collaborative Innovation Center of Extreme Optics, Shanxi University, Taiyuan, Shanxi 030006,  
P. R. China

Corresponding author: hclin@ee.ecnu.edu.cn

## 1. GdN LED colour conversion

A blue GdN LED chip (0.6 watt) with the emission peak at 455 nm was immersed into 4 mL MAPbBr<sub>3</sub> or MAPbI<sub>3</sub> nanofluid in a 5 mL beaker. It was connected with wires and power source. When power on, the liquid emitted its fluorescent light and the blue emitted light of the LED chip was completely transformed to green or red emission.

## 2. XRD measurements

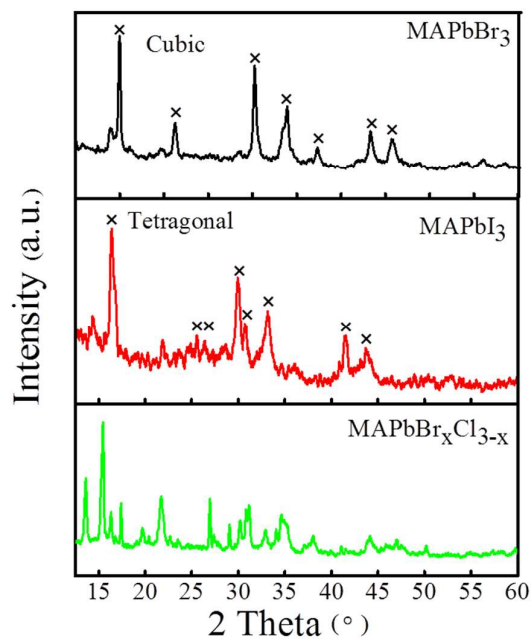

Figure S1. The PXRD patterns of MAPbBr<sub>3</sub>, MAPbBr<sub>3-x</sub>Cl<sub>x</sub> and MAPbI<sub>3</sub> NCs.

### 3. Stability investigation of MAPbBr<sub>3</sub> NCs

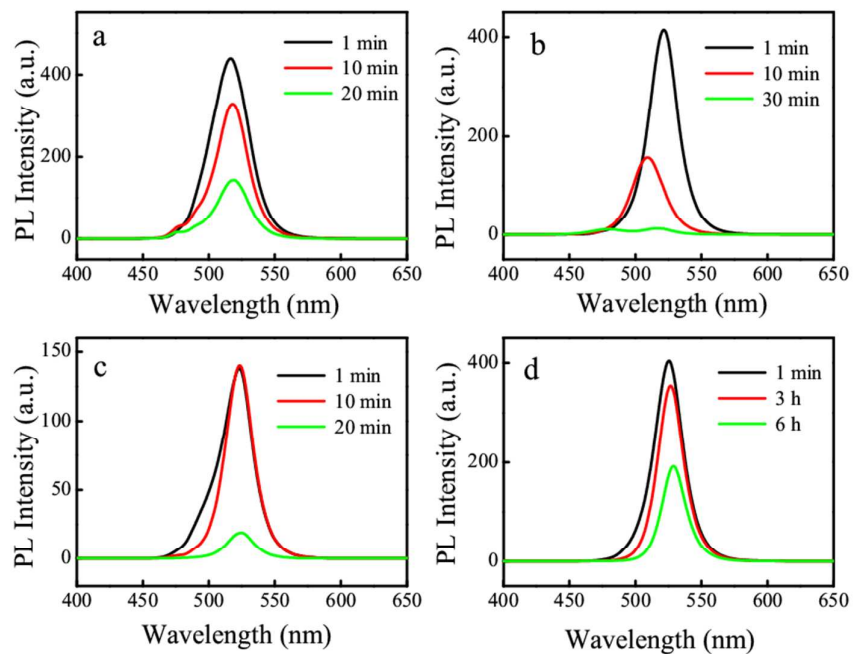

Figure S2. Evaluation of PL spectra of the MAPbBr<sub>3</sub> NCs dispersed in other organic solvents in the existence of water. (a) PhCl; (b) CCl<sub>4</sub>; (c) n-hexane; (d) 1-octadecene.

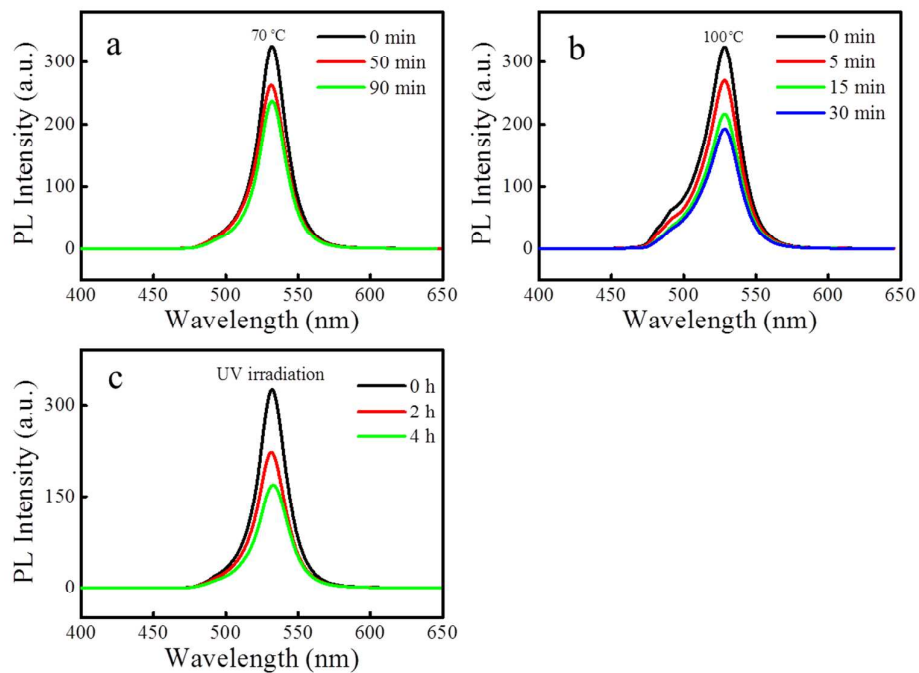

Figure S3. Evaluation of PL spectra of the MAPbBr<sub>3</sub> NCs dispersed in toluene. (a) Curing at 70 °C; (b) Curing at 100 °C; (c) Exposure to UV light irradiation.

#### 4. The measurement of photoluminescence quantum yield

The calculation of the relative quantum yield.<sup>1-3</sup> Absolute values are calculated using the standard samples, and their quantum yield are fixed and known, according to the following equation:

$$Q_X = Q_{ST} (K_X/K_{ST}) (\eta_X^2/\eta_{ST}^2)$$

Where the subscripts ST and X denote standard (Coumarin-6 or Rhodamine B, in ethanol) and sample (perovskite NCs, in silicone oils and toluene) respectively. Q is the fluorescence quantum yield. The fluorescence quantum yield of Coumarin-6 is 77 %, and Rhodamine B is 89%. K is the gradient from the plot of integrated fluorescence intensity vs absorbance, and  $\eta$  is the refractive index of the solvent.

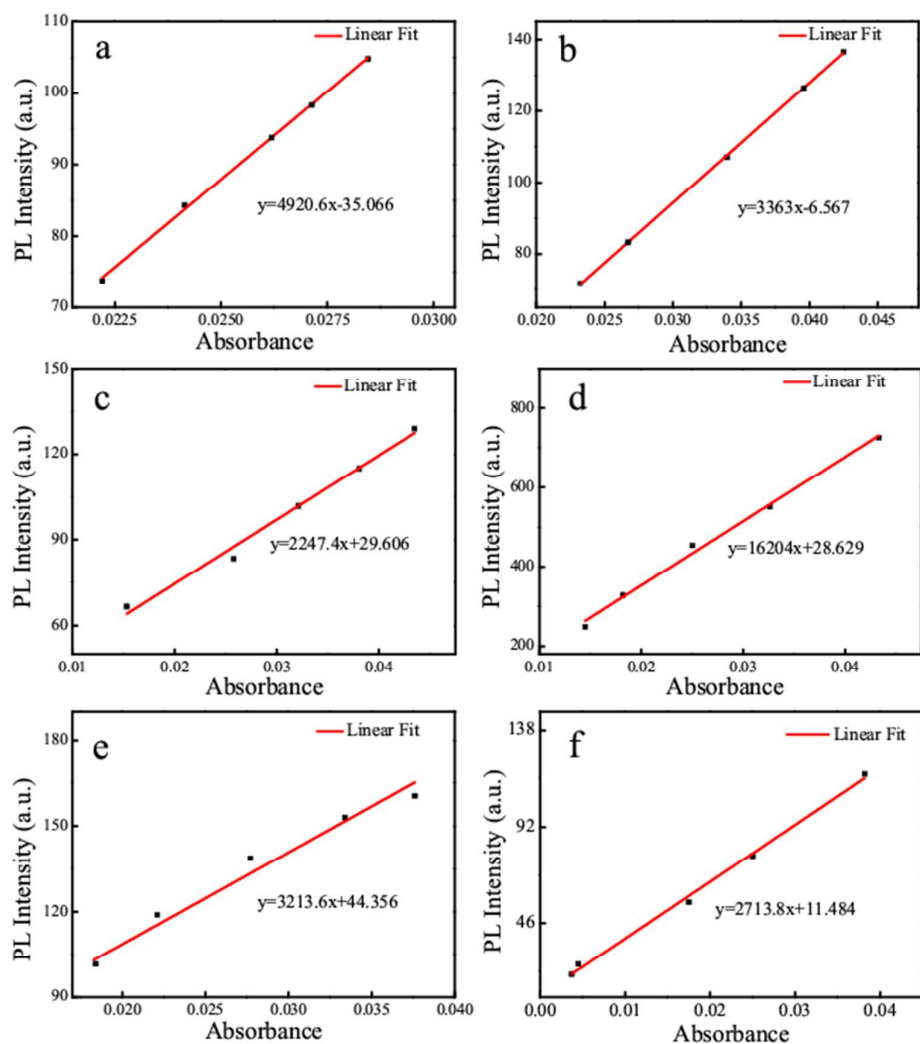

Figure S4. The fitting curves of integrated PL intensity vs absorbance. (a) Coumarin-6 in ethanol (QY: 0.77). (b) MAPbBr<sub>3</sub> NCs in DMS (500 mPa·s). (c) MAPbBr<sub>3-x</sub>Cl<sub>x</sub> in DMS (500 mPa·s). (d) Rhodamine B in ethanol (QY: 0.89). (e) MAPbI<sub>3</sub> in DMS (500 mPa·s). (f) MAPbBr<sub>3</sub> in toluene.

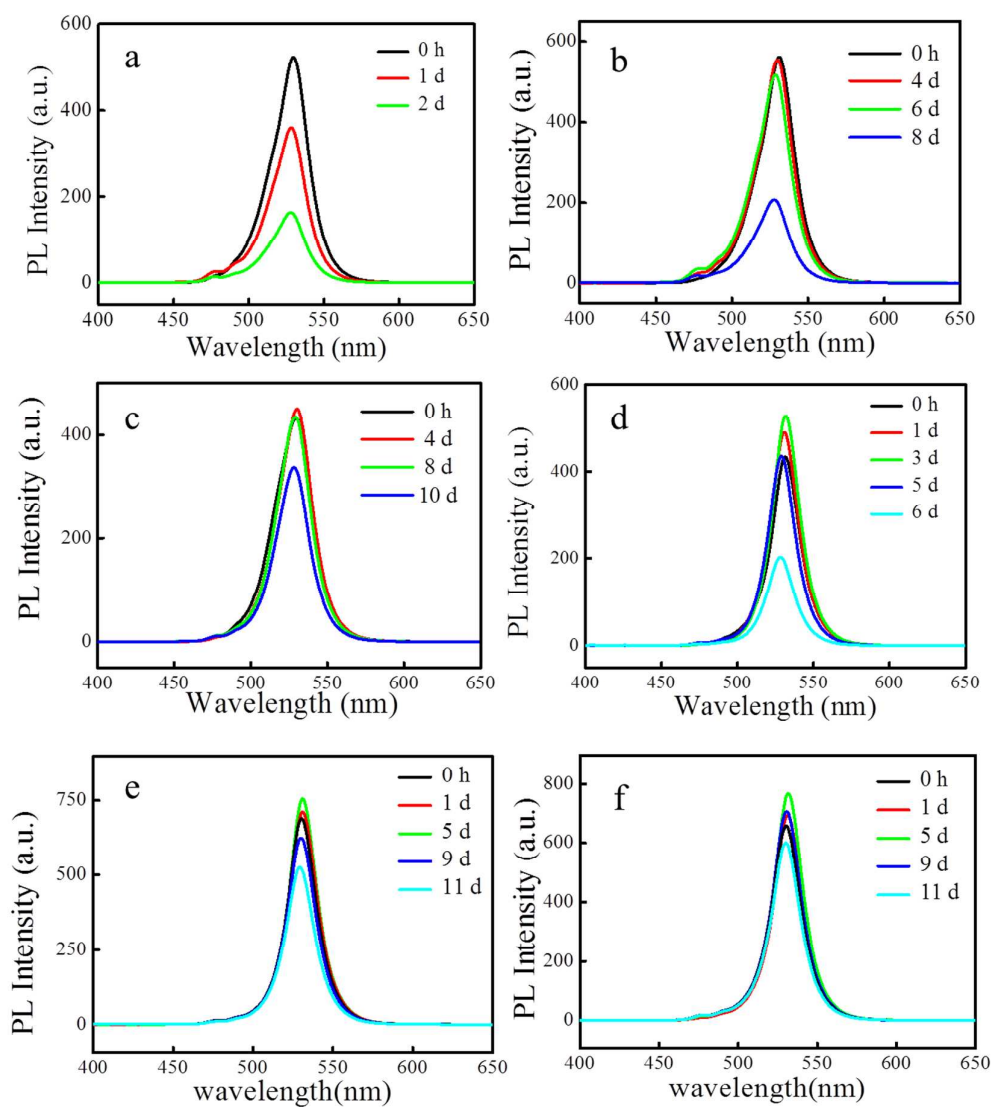

Figure S5. Evaluation of PL spectra of the MAPbBr<sub>3</sub> NCs dispersed in other silicon oils in the existence of water. (a) 50, (b) 100 and (c) 1000 mPa·s in DSM. (d) 100, (e) 500 and (f) 1000 mPa·s in VS.

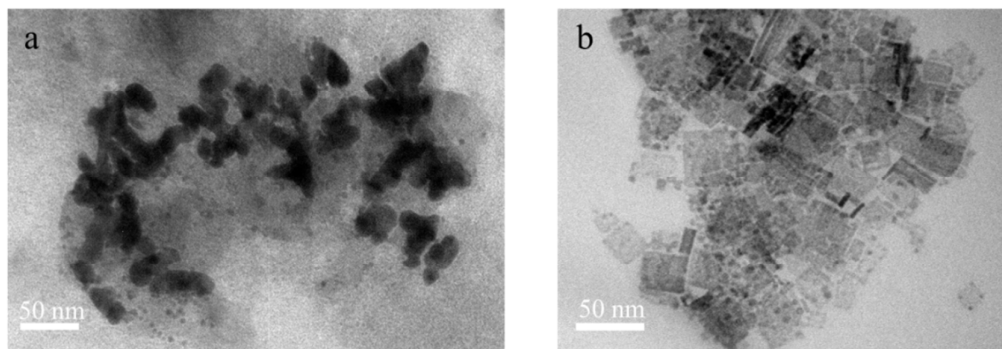

Figure S6. The TEM images of (a) MAPbI<sub>3</sub> and (b) MAPbBr<sub>3-x</sub>Cl<sub>x</sub> NCs.

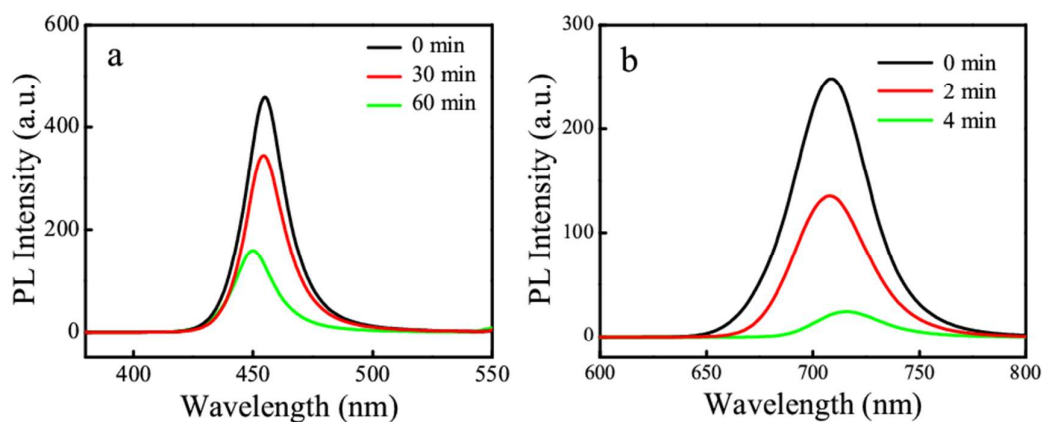

Figure S7. Evaluation of PL spectra of the (a) MAPbBr<sub>3-x</sub>Cl<sub>x</sub> (b) MAPbI<sub>3</sub> dispersed in toluene after the addition of water.

## REFERENCES

- (1) Herz, E.; Marchincin, T.; Connelly, L.; Bonner, D.; Burns, A.; Switalski, S.; Wiesner, U., Relative quantum yield measurements of coumarin encapsulated in core-shell silica nanoparticles. *Journal of fluorescence* **2010**, *20*, 67-72.
- (2) Lakowicz, J. R., Principles of Fluorescence Spectroscopy, Kluwer Academic/Plenum Press, New York, 1999, Second Edition.
- (3) Scaiano, J. C., Handbook of Organic Photochemistry, CRC Press, 1989.
